# Supplementary material
Source: publisher figshare collection journal article supplement (https://tandf.figshare.com/ndownloader/files/22353891)
Supplement: Supplementary file 1 [file 22353891]

## Supplemental material

### **Production of styrene oxide from styrene by a recombinant *Escherichia coli* with enhanced AcrAB-TolC efflux pump level in an aqueous-organic solvent two-phase system**

Noriyuki Doukyu<sup>a,b\*</sup> and Shinichiro Iida<sup>a,b</sup>

<sup>a</sup>Department of Life Science, Toyo University, 1-1-1 Izumino, Itakura-machi, Gunma, 374-0193, Japan

<sup>b</sup>Bio-Nano Electronic Research Center, Toyo University, 2100, Kujirai, Kawagoe, Saitama, 350-8585, Japan

\*Corresponding author

Noriyuki Doukyu

Department of Life Science, Toyo University, 1-1-1 Izumino, Itakura-machi, Gunma, Japan

E-mail: dokyu@ toyo. jp

Tel.: +81-276-829219

FAX: +81-276-829219

Table S1 Styrene concentration partitioned into water phase in the two-phase system

| Organic solvent  | Styrene concn. in organic solvent (%[wt vol <sup>-1</sup> ]) | Styrene concn. in water phase (mg ml <sup>-1</sup> ) <sup>a</sup> |
|------------------|--------------------------------------------------------------|-------------------------------------------------------------------|
| Hexadecane       | 5                                                            | 0.024 ± 0.003                                                     |
|                  | 10                                                           | 0.090 ± 0.008                                                     |
|                  | 20                                                           | 0.150 ± 0.013                                                     |
| <i>n</i> -Hexane | 5                                                            | 0.018 ± 0.003                                                     |
|                  | 10                                                           | 0.076 ± 0.006                                                     |
|                  | 20                                                           | 0.142 ± 0.011                                                     |
| Cyclohexane      | 5                                                            | 0.032 ± 0.004                                                     |
|                  | 10                                                           | 0.113 ± 0.015                                                     |
|                  | 20                                                           | 0.242 ± 0.023                                                     |

<sup>a</sup>Four milliliters of LBGMg(IPTG, Ara, Amp, Km) medium without inoculation of *E. coli* strains overlaid with 1 ml of an organic solvent containing various amounts of styrene was incubated with shaking at 30°C. After 30 min, samples were recovered from the water phase, and the concentrations of styrene partitioned into the water phase in the two-phase system were analyzed by HPLC. Mean values of three independent experiments are shown.
